# Supplementary material for: Latifolin, a Natural Flavonoid, Isolated from the Heartwood of Dalbergia odorifera Induces Bioactivities through Apoptosis, Autophagy, and Necroptosis in Human Oral Squamous Cell Carcinoma
Source: MDPI journal article supplement (doi:10.3390/ijms232113629), 2022-11-07

## Supplementary Figure Legend

- **Supplementary Figure S1. NMR of Latif from heartwood of *D. odorifera*.**
- **(A, B)** The  $^1\text{H}$ -NMR (500 MHz,  $\text{CD}_3\text{OD}$ ) spectrum (A) and  $^{13}\text{C}$ -NMR (125 MHz,  $\text{CD}_3\text{OD}$ ) spectrum (B) of Latif

A

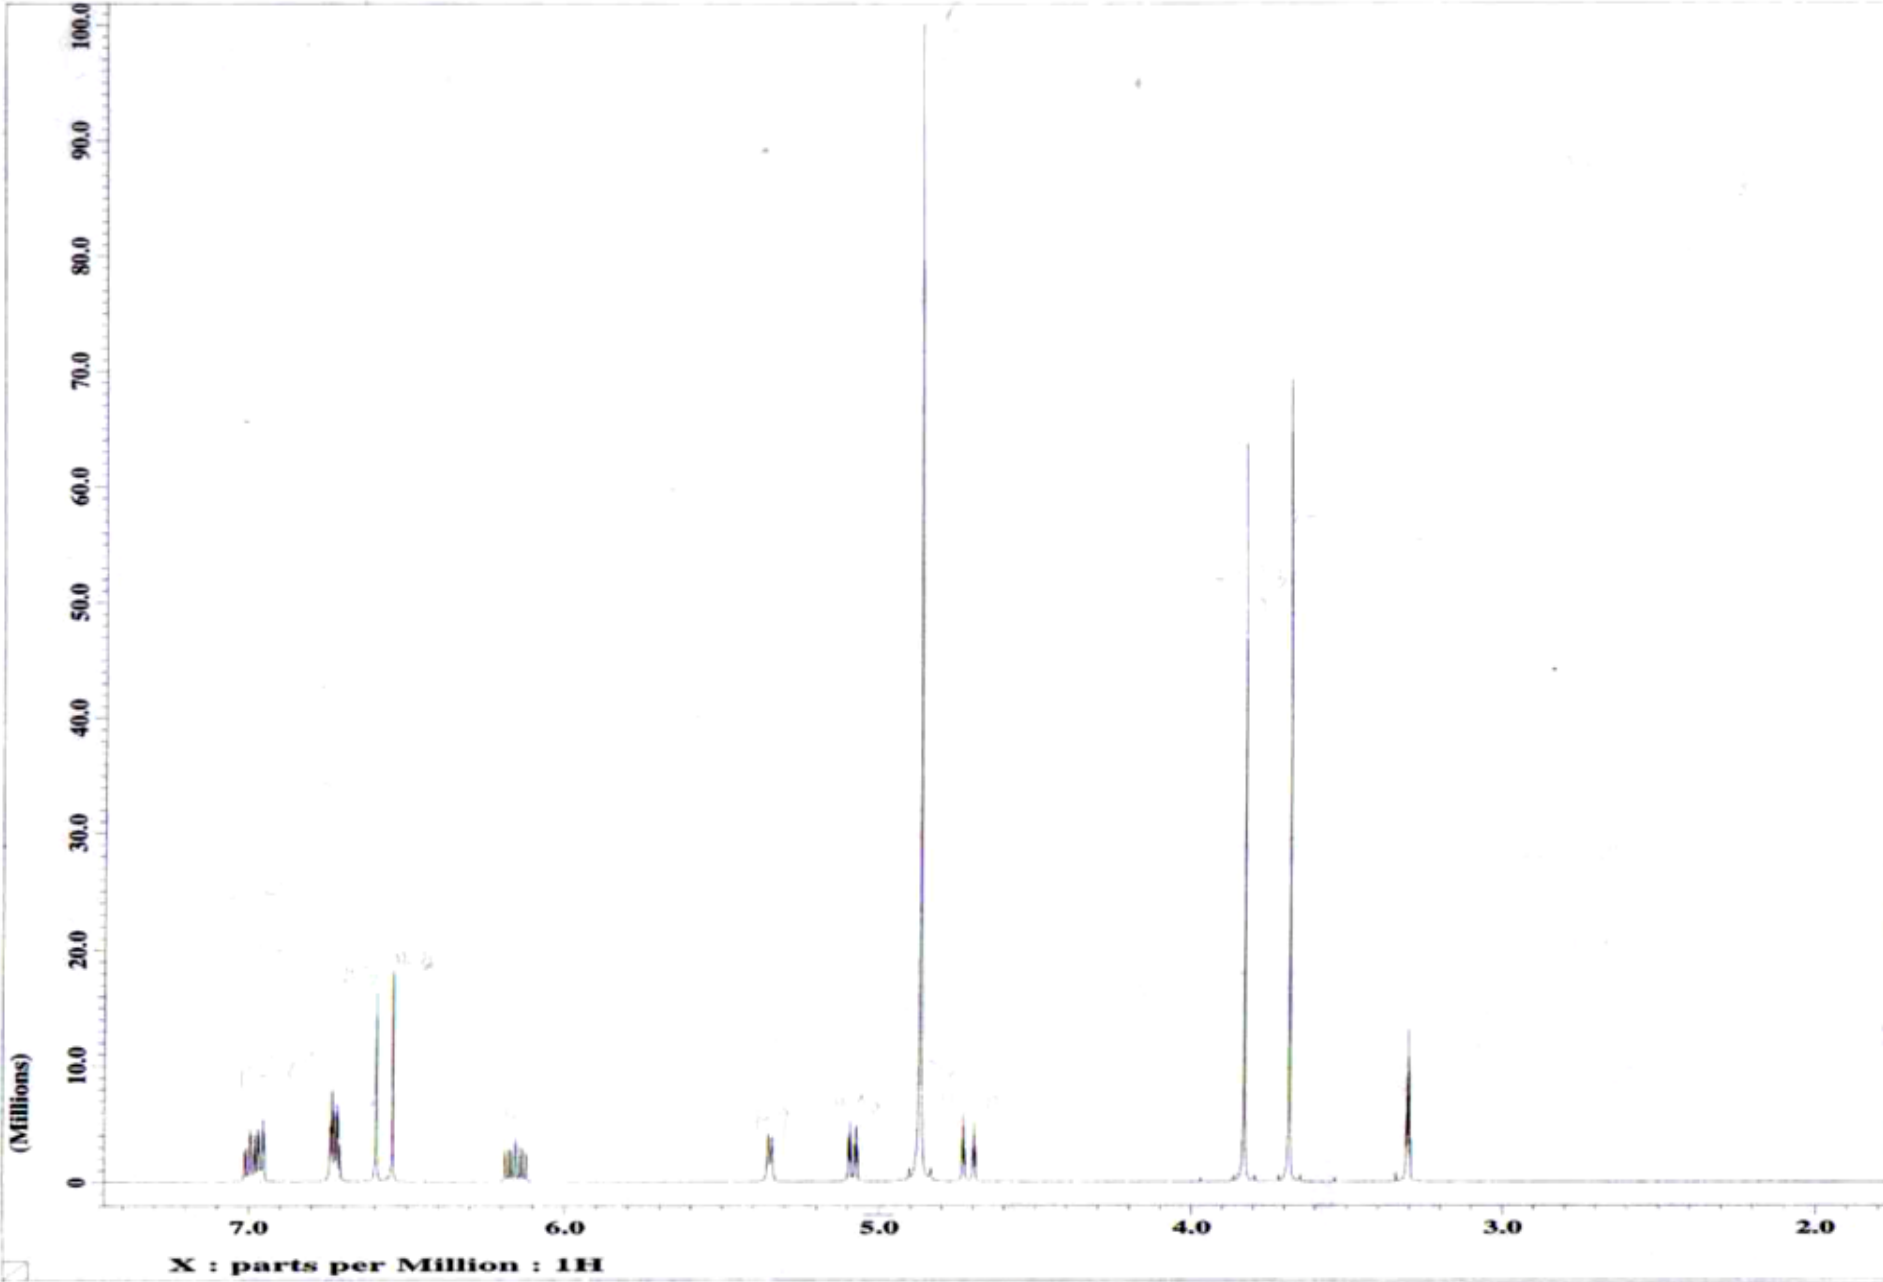

B

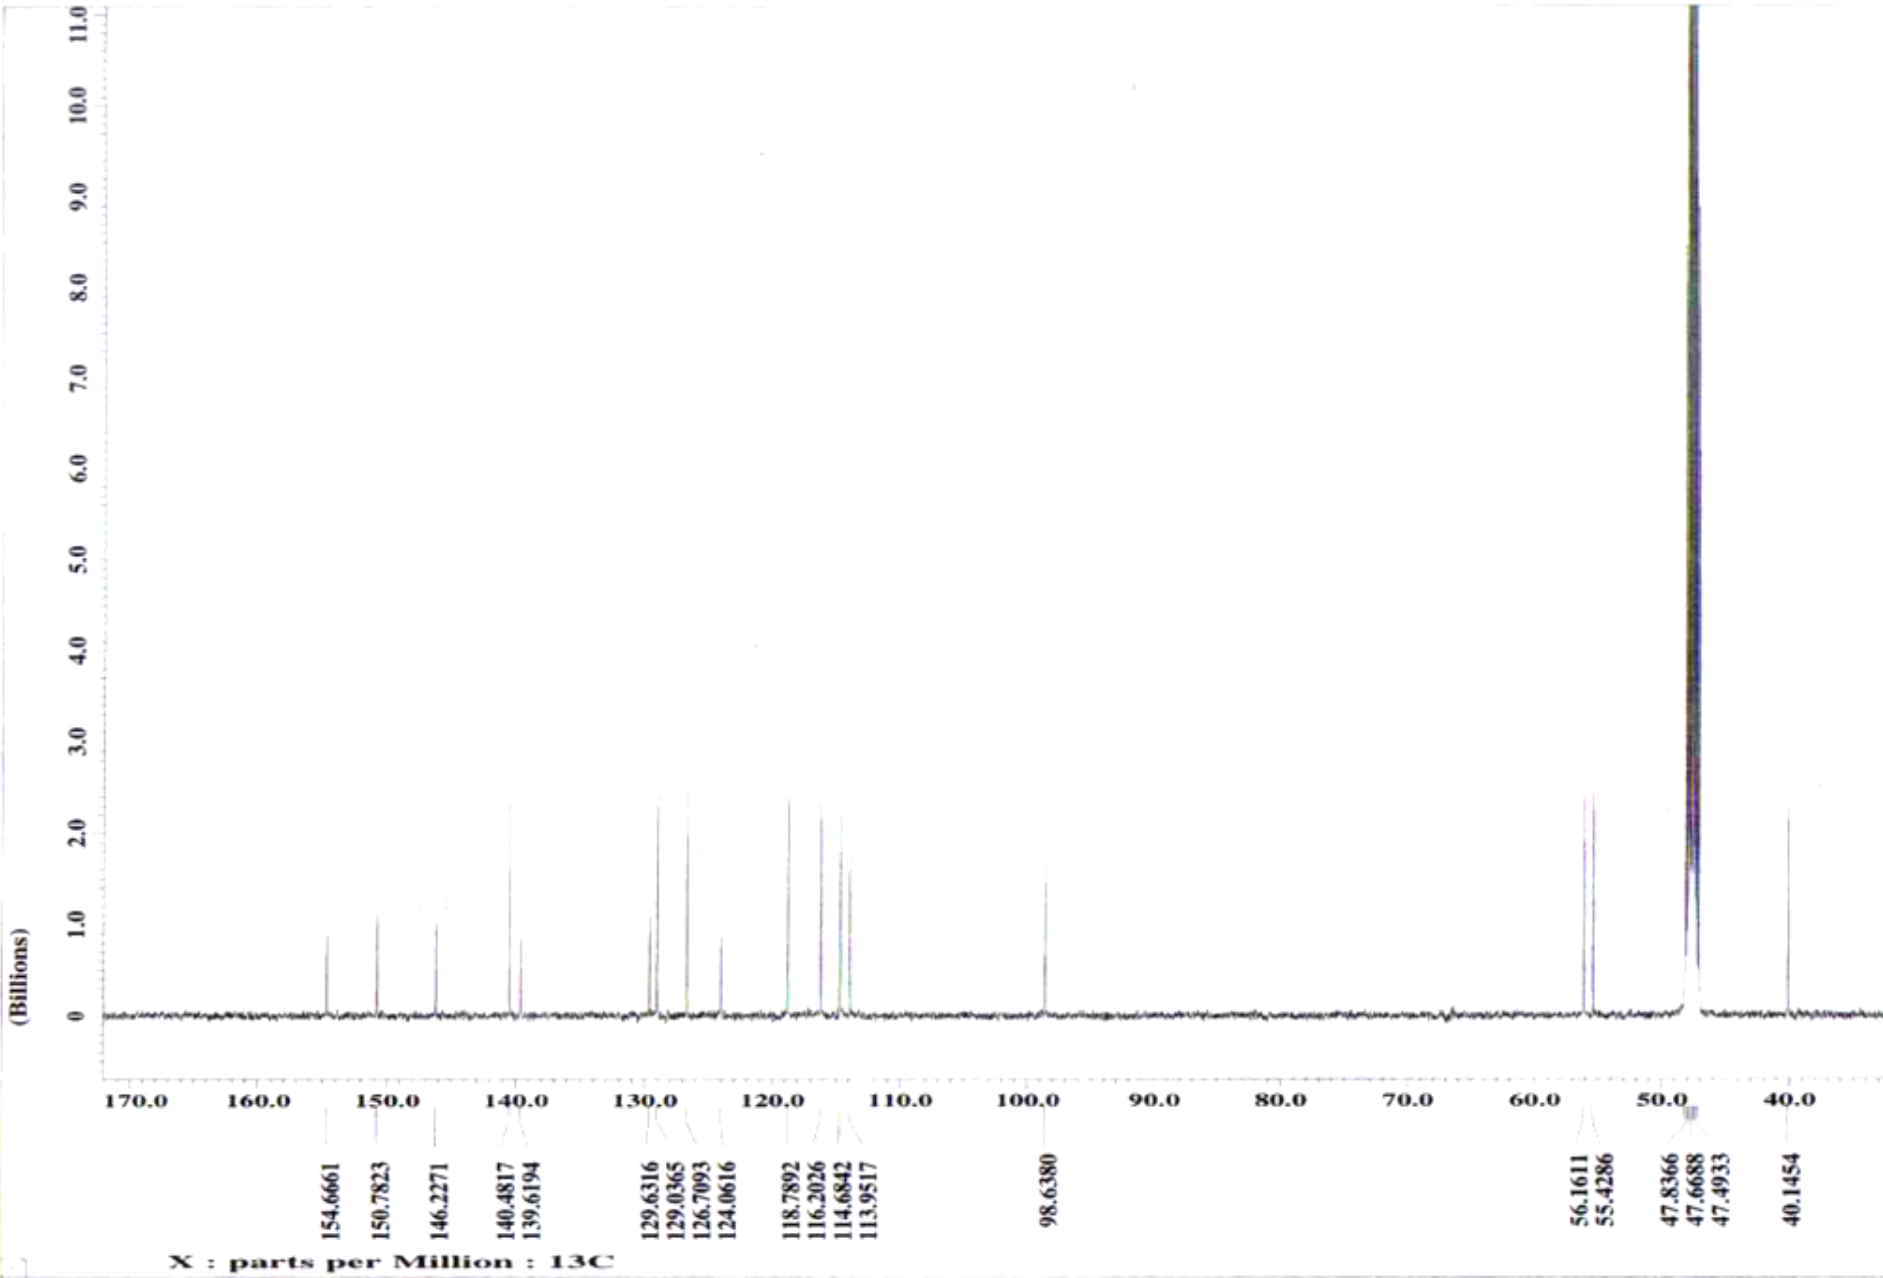

Supplement: s1 [file s1]
